# Supplementary material
Source: PubMed Central journal article supplement (PMC7292569)
Supplement: NIHMS1581012-supplement-1.pdf [file NIHMS1581012-supplement-1.pdf]

**Cell Reports, Volume 30**

**Supplemental Information**

**Brain Endothelial Cells Are Exquisite Sensors  
of Age-Related Circulatory Cues**

**Michelle B. Chen, Andrew C. Yang, Hanadie Yousef, Davis Lee, Winnie Chen, Nicholas Schaum, Benoit Lehallier, Stephen R. Quake, and Tony Wyss-Coray**

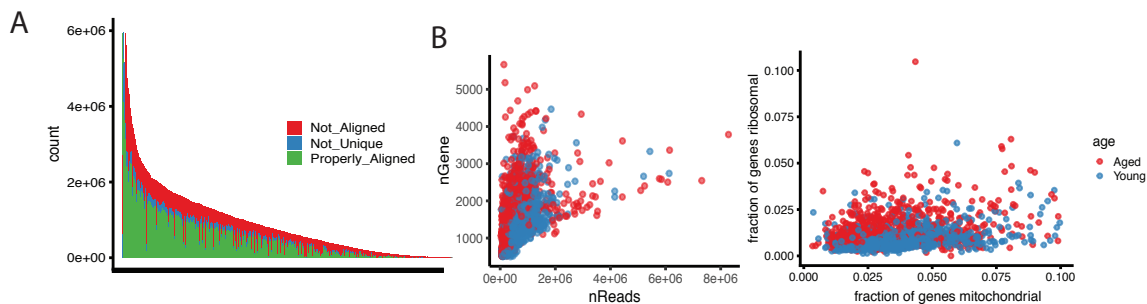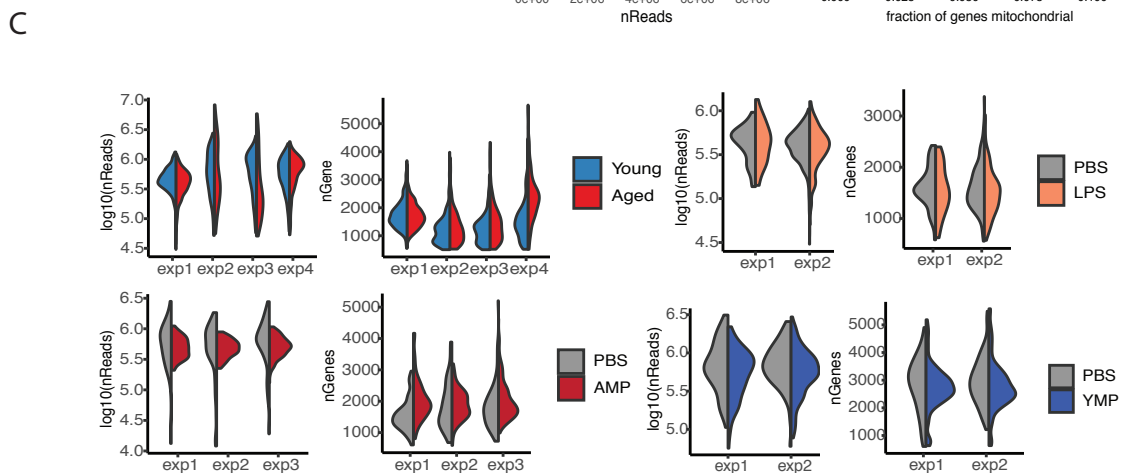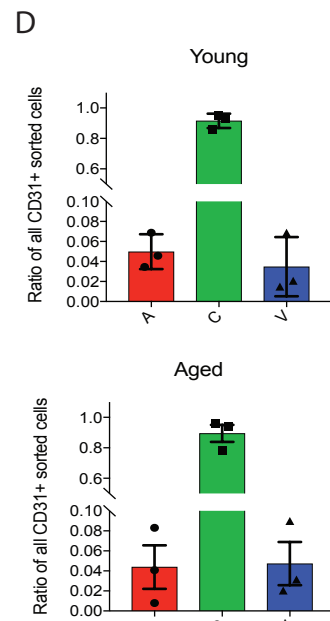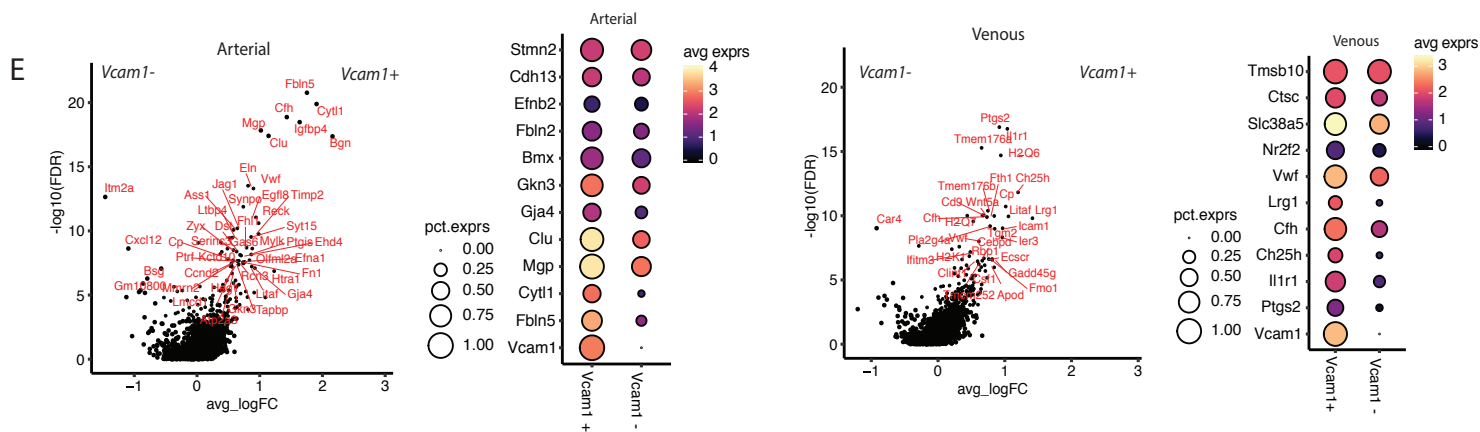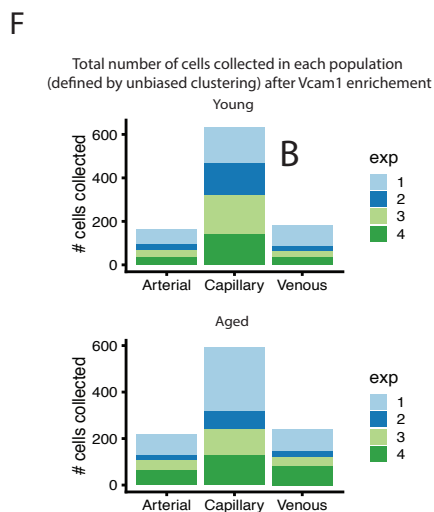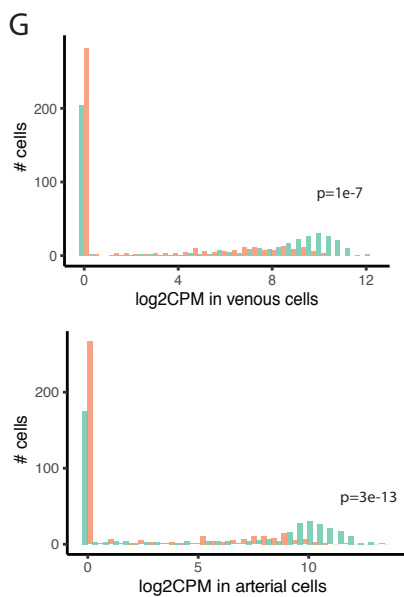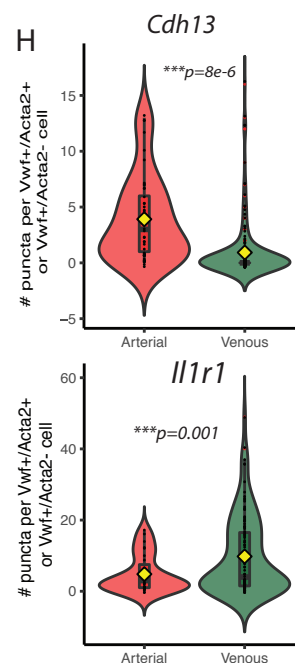

**Figure S1. Description of data quality metrics and *Vcam1* enrichment strategy of arterial and venous cells. Related to Figure 1.**

- (A) Bar plots of the number of reads for each cell (pre-QC) that is not aligned, not unique and properly aligned, for all 4 replicates of young and aged cells (total 2,034 cells).
- (B) (Left) Scatterplot of the number of reads versus the number of genes expressed per cell (pre-QC). Cells are then filtered to retain those expressing at least 500 genes or at least 50000 aligned (mapped) reads. (Right) Relationship between fraction of genes mitochondrial genes and fraction of ribosomal genes, for each cell. Only cells which have <10% mitochondrial genes and <10% ribosomal genes are depicted. Cells are colored by aged (red) or young (blue).
- (C) Number of reads and genes detected per biological replicate (see Table S1) for each experimental condition (Aged vs Young, PBS vs LPS, AMP vs PBS, and YMP vs PBS).
- (D) Ratio of all sorted cells (based only on CD31<sup>+</sup>CD45<sup>-</sup>) that identifies as either arterial (A) or venous (V) in segmental identity (based on the expression of at least 1/3 canonical marker genes), for both aged and young mice. Note the break in the axes. Error bars represent stdev.
- (E) Volcano plots of the top DEGs between *Vcam1*<sup>+</sup> and *Vcam1*<sup>-</sup> cells in either arterial or venous populations. Note the transcriptional activation of *Vcam1*<sup>+</sup> cells in both populations. Dotted heatmaps show the average expression level of key arterial and venous defining markers and the relative differences in percent expression in *Vcam1*<sup>+</sup> and *Vcam1*<sup>-</sup> populations. Ideal arterial and venous markers should not be differentially expressed between *Vcam1*<sup>+/-</sup> populations, in order encompass the range of arterial and venous cells.
- (F) The total number of cells collected from each replicate that identifies as A, C or V, based on unbiased transcriptome clustering, after the addition of VCAM1-enriched samples (~20% of all cells).
- (G) Number of venous cells in this dataset expressing *Il1r1* or *Nr2f2* at various levels. Number of arterial cells in this dataset expressing *Cdh13* or *Efnb2* at various levels.
- (H) Quantification of RNA *in situ* hybridization of *Cdh13* and *Il1r1* in arterial (*Vwf*<sup>+</sup>*Acta2*<sup>+</sup>) and venous (*Vwf*<sup>-</sup>*Acta2*<sup>-</sup>) cells, respectively (*Cdh13*: n=45 (Arterial) and 89 (Venous); *Il1r1*: n=36 (Arterial) and 92 (Venous)).

Artery - Cdh13  
RP\_070205\_01\_C03

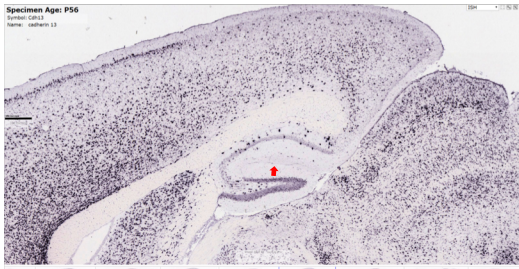

Artery - Clu  
RP\_070212\_01\_A02

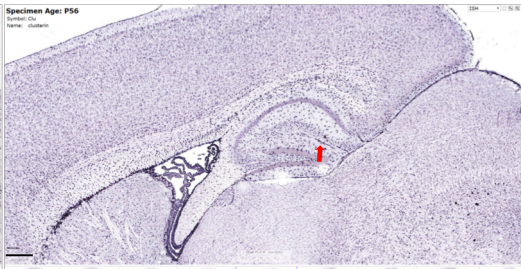

Artery - Mgp  
RP\_Baylor\_102905

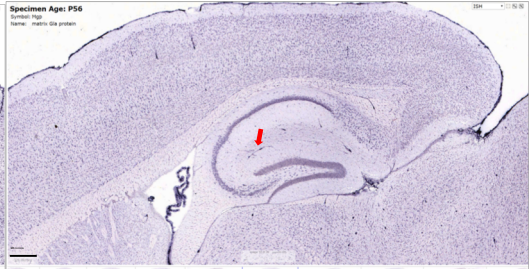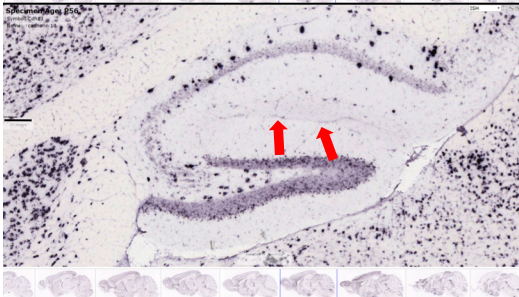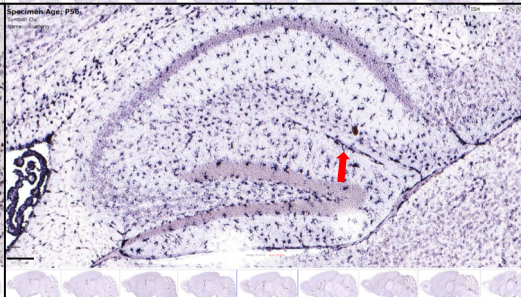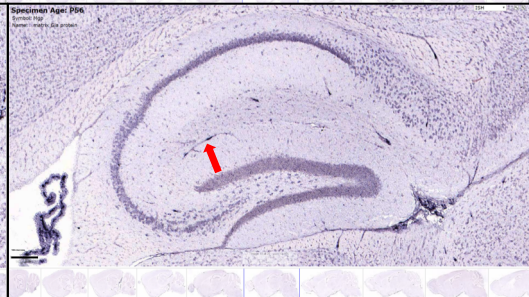

Artery - Stmn2  
RP\_050329\_01\_E10

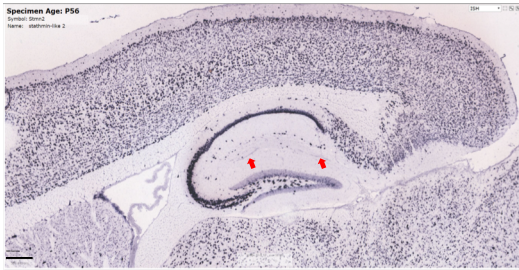

Capillary/Vein - Tmsb10  
RP\_050510\_02\_D07

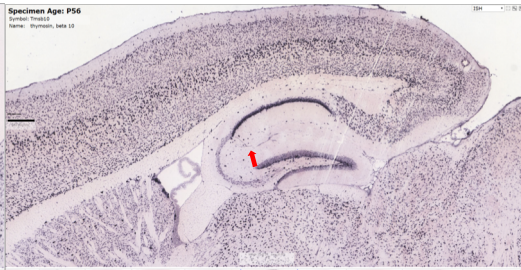

Vein - Il1r1  
RP\_050503\_02\_F10

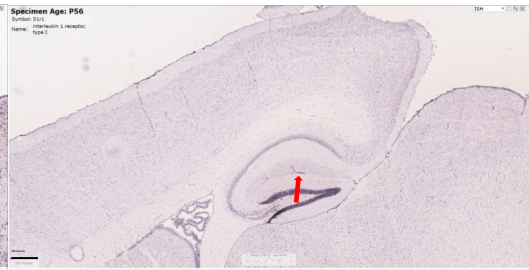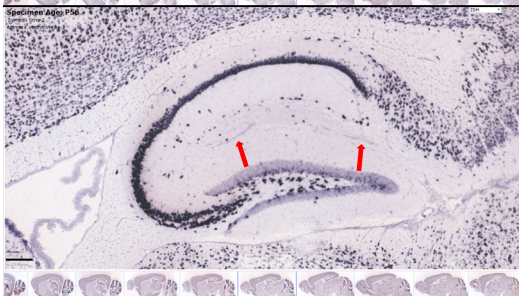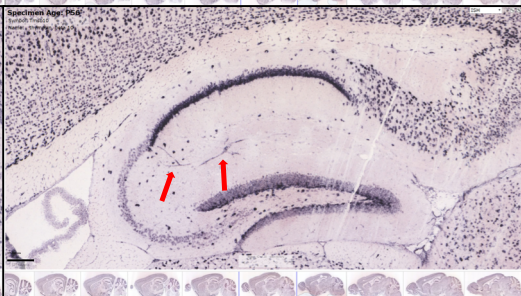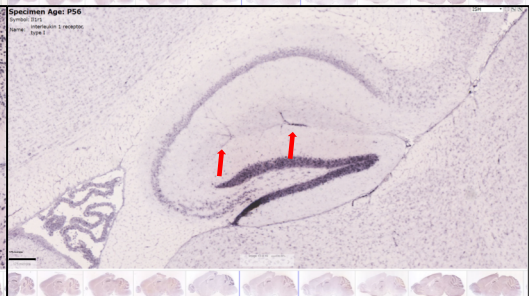

Vein - Cfh  
RP\_050321\_04\_B05

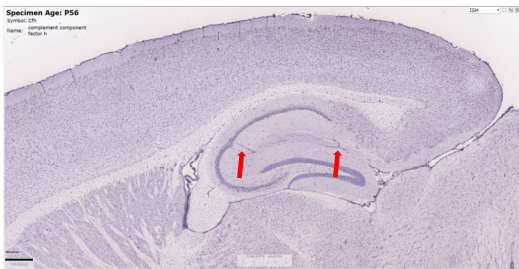

Vein - Ctsc  
RP\_050426\_03\_G05

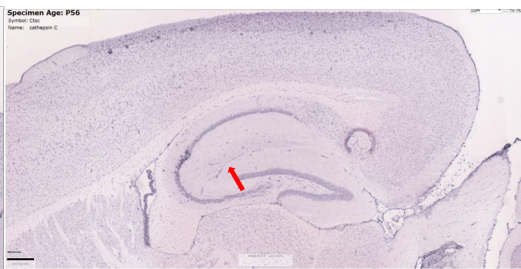

Vein - Cldn5  
RP\_071018\_01\_F08

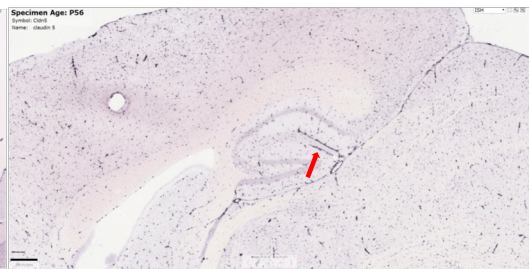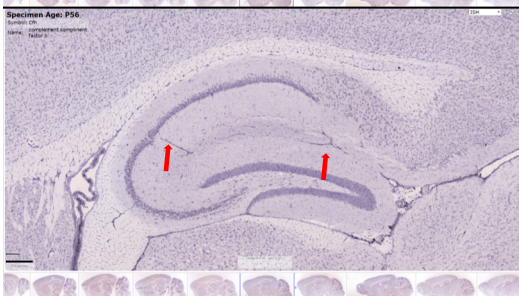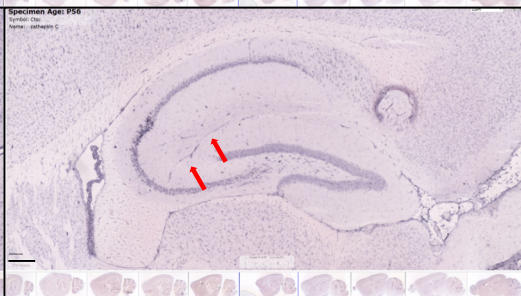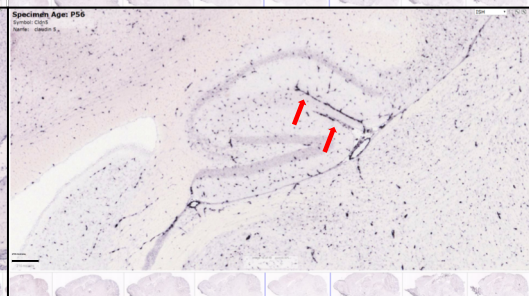

**Figure S2. Identification of putative zonation markers in the Allen ISH Brain Atlas.**

**Related to Figure 1.**

Representative images from the Allen ISH Brain Atlas demonstrating the expression of arterial (*Cdh13*, *Clu*, *Mgp*, *Stmn2*) and Venous (*Tmsb10*, *Il1r1*, *Cfh*, *Ctsc*, *Cldn5*) genes in hippocampal vasculature. Scale bars (from Left to Right, Top to bottom = 350  $\mu\text{m}$ , 362  $\mu\text{m}$ , 326  $\mu\text{m}$ , 131  $\mu\text{m}$ , 125  $\mu\text{m}$ , 163  $\mu\text{m}$ , 300  $\mu\text{m}$ , 350  $\mu\text{m}$ , 350  $\mu\text{m}$ , 175  $\mu\text{m}$ , 175  $\mu\text{m}$ , 175  $\mu\text{m}$ , 350  $\mu\text{m}$ , 300  $\mu\text{m}$ , 350  $\mu\text{m}$ , 210  $\mu\text{m}$ , 210  $\mu\text{m}$ , 210  $\mu\text{m}$ ).

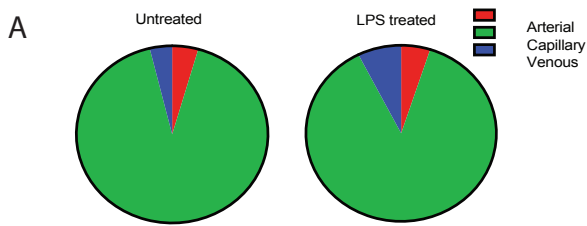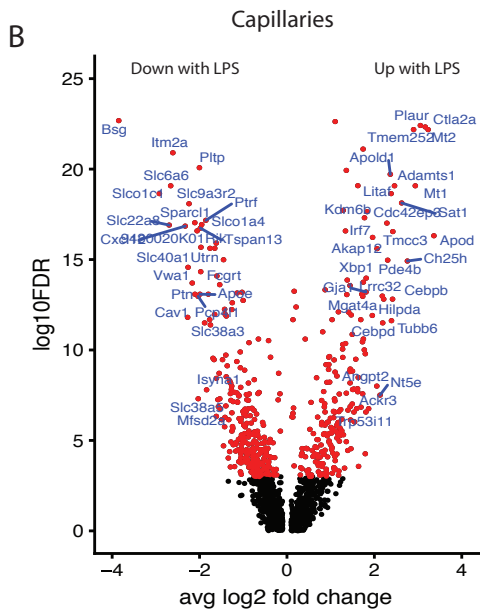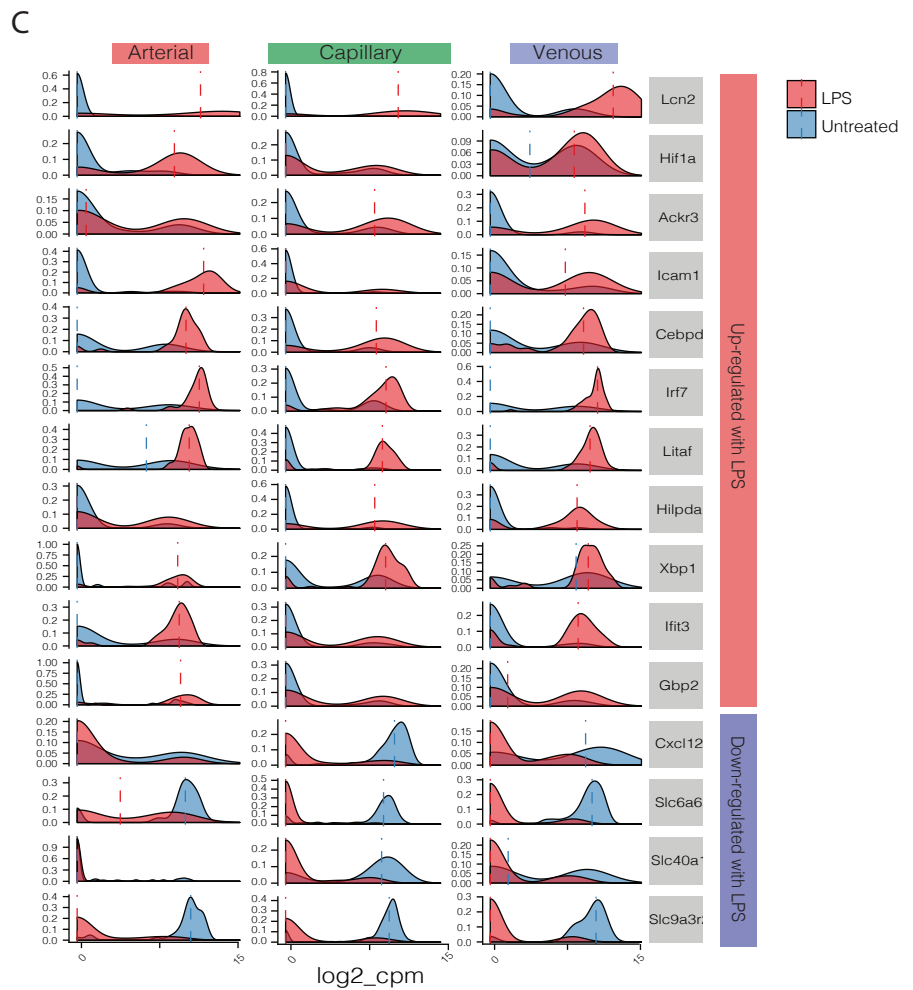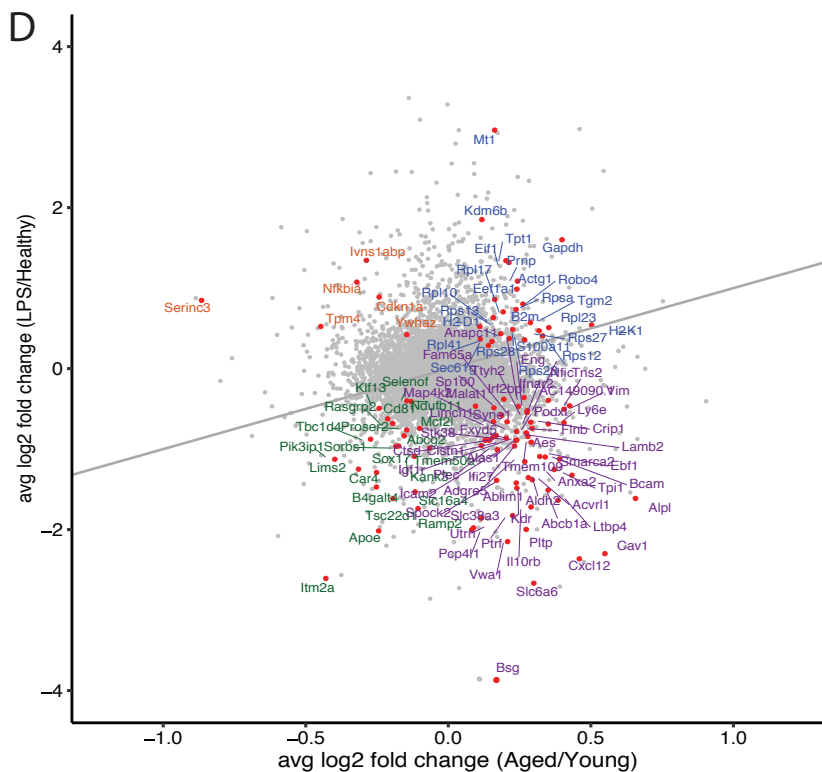

**Figure S3. Analysis of DEGs in LPS treated over PBS treated mice. Related to Figure 2.**

- (A) Ratio of A-C-V cells collected in LPS-treated and untreated mice through unbiased CD31<sup>+</sup>CD45<sup>-</sup> sorting remains largely unchanged.
- (B) Volcano plot of differentially expressed genes (red: FDR<0.1) when LPS-treated capillaries are compared to PBS-treated capillaries.
- (C) Density plots of key genes from showing the single cell distributions of expression levels in A, C and V segments. Dotted lines indicate median of the LPS- or PBS-treated sample distributions. All comparisons shown between LPS- and PBS-treated are significant (p<0.05).
- (D) Scatterplot showing the genes which are commonly and oppositely differentially expressed (FDR<0.1 in both) between aging capillaries and LPS-treated capillaries. Notes the relatively low number of commonly upregulated DEGs (blue). Commonly downregulated genes (green), differentially upregulated with LPS but downregulated with age (orange), and differentially downregulated with LPS but upregulated with age (purple) are also shown.

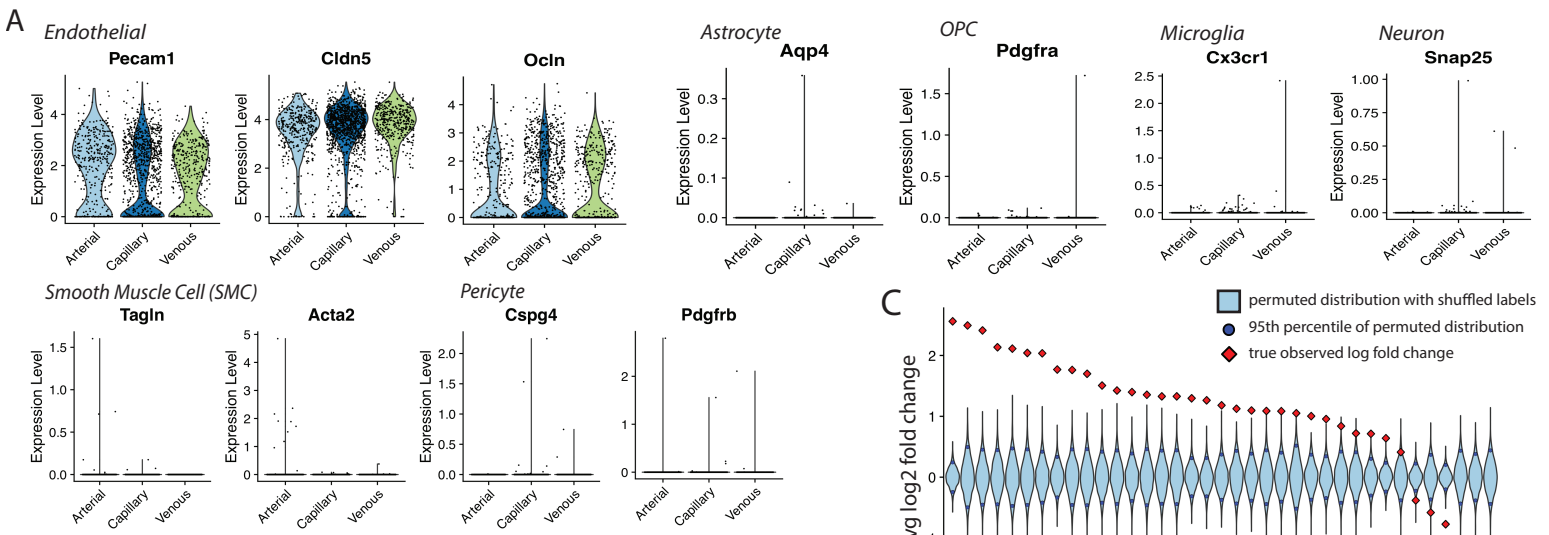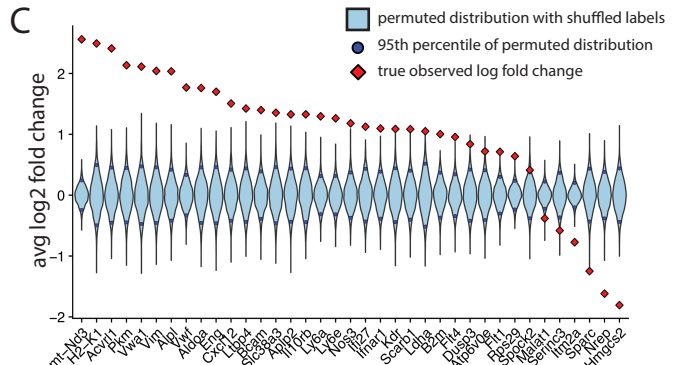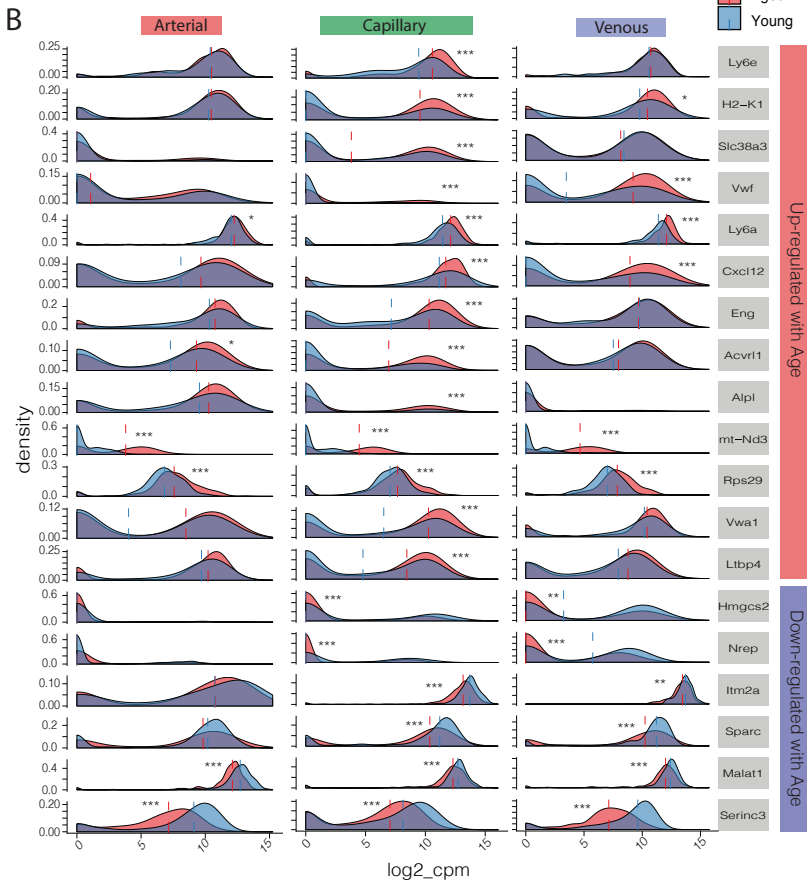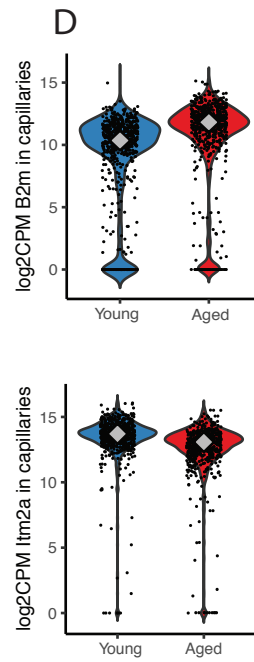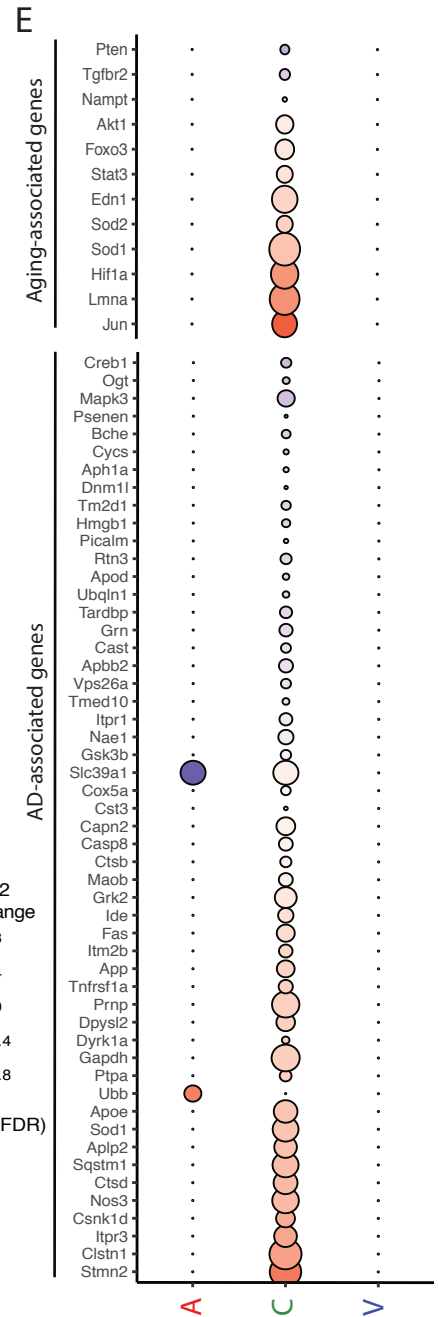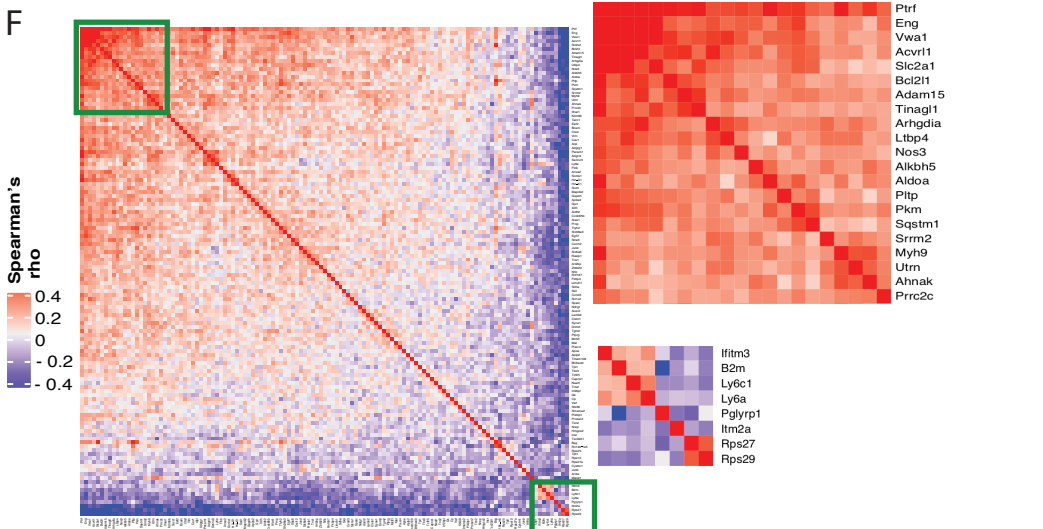



**Figure S4. Analysis of aging-related DEGs. Related to Figure 3.**

- (A) Violin plots of the expression levels of various endothelial, mural cell and parenchymal cell markers in the dataset.
- (B) Density plots of key genes from showing the single cell distributions of expression levels in A, C and V segments. Dotted lines indicate median of the young or aged distribution. \* $p < 0.1$ , \*\* $p < 0.01$ , \*\*\* $p < 0.001$ .
- (C) Violin plot of the permuted distribution (when cell age labels are shuffled) of average log fold changes for several genes of interest. All genes show true observed values well above the 95<sup>th</sup> percentile of the permuted distribution.
- (D) Violin plot of  $\log_2$ CPM or *B2m* and *Itm2a* in aged vs young capillaries, which were validated via RNAscope.
- (E) Dotted heatmap of the average  $\log_2$ (fold change) and statistical significance of genes associated with Alzheimer's disease and organismal aging as they change with age in arterial, capillary and venous cells.
- (F) Correlation heatmap of the expression level of the top 125 aging-associated DEGs in capillaries. Bottom and top inset (of the green boxes) show the higher level of correlation between specific DEGs.

**A**

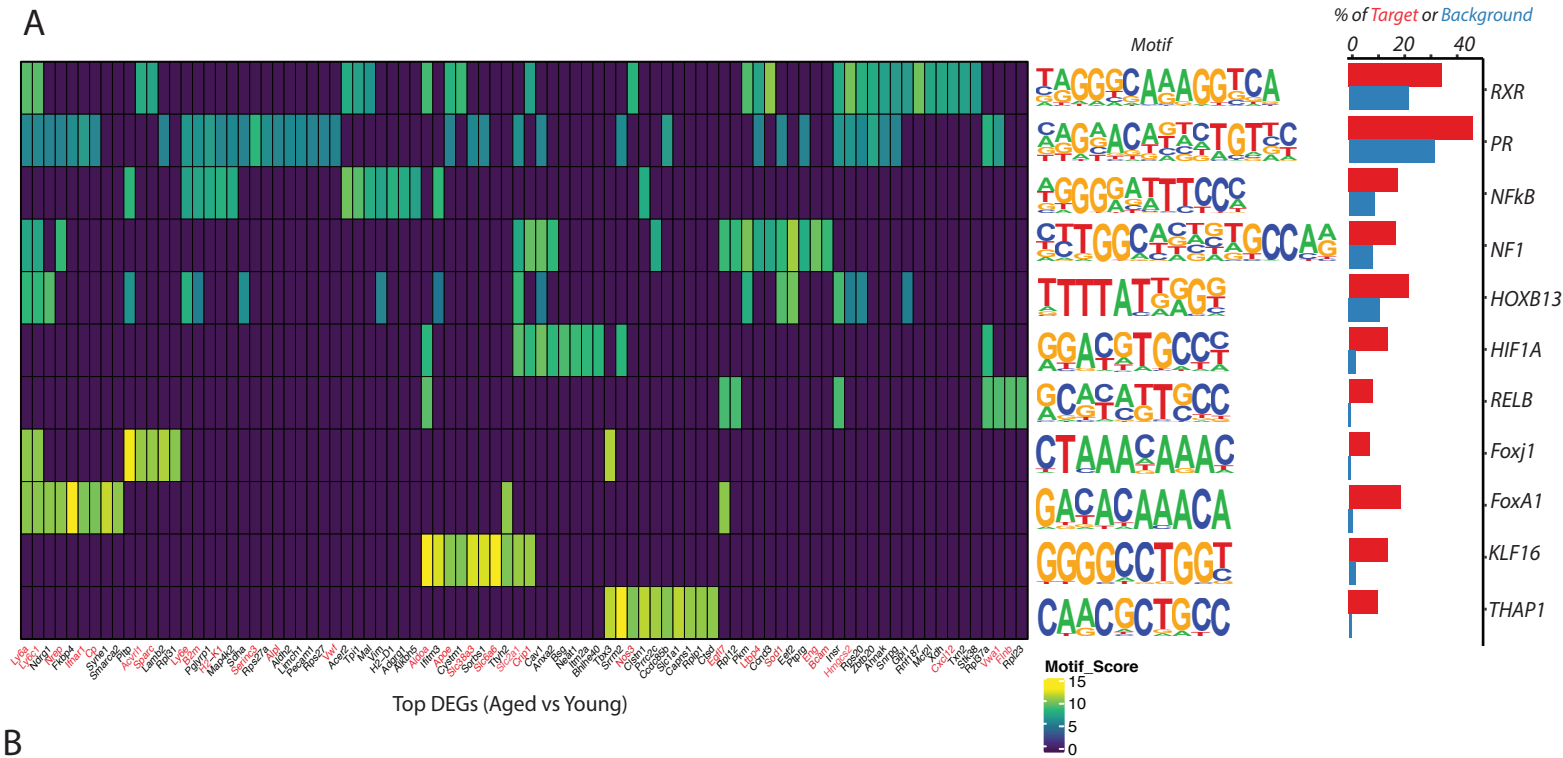

**B**

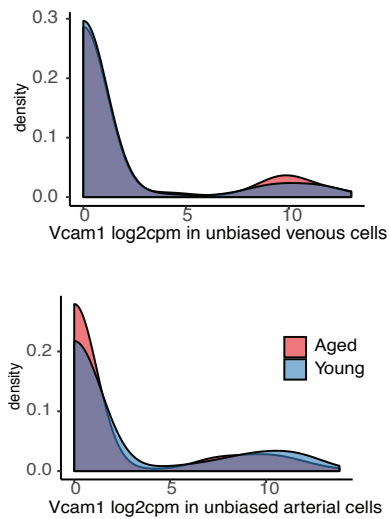

**C**

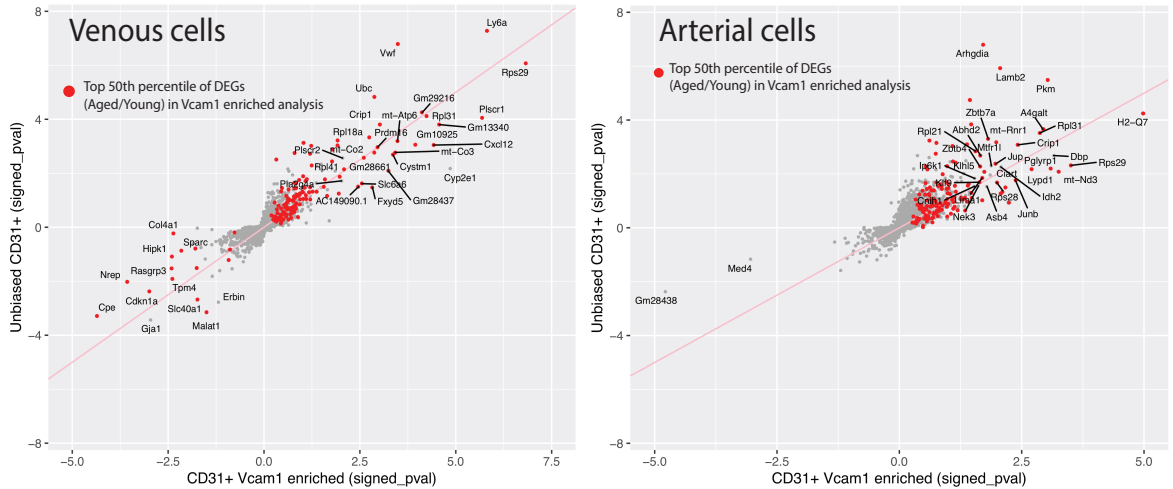

**D**

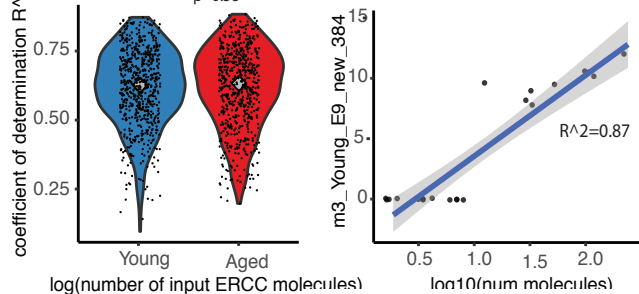

**E**

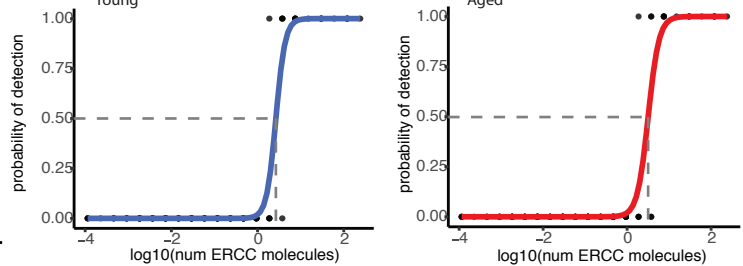

**F**

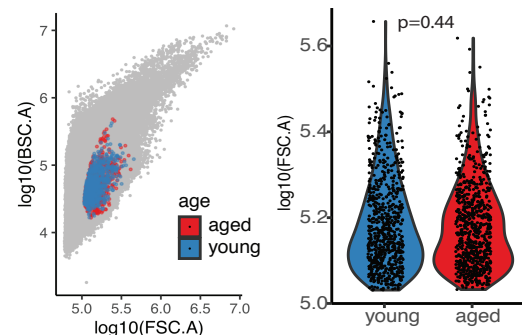

**G**

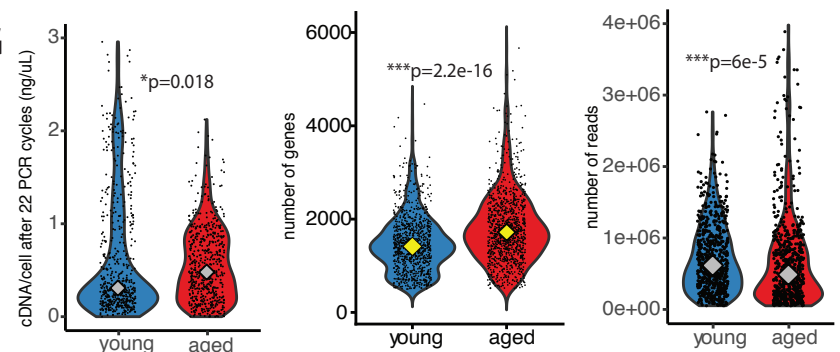

**Figure S5. Analysis of aging-related DEGs, validation of *Vcam1* enrichment strategy, analysis of sequencing-associated differences between aged and young BECs. Related to Figure 3.**

- (A) Regulatory motif enrichment analysis of the top 125 aging-associated DEGs in capillaries was performed using HOMER. For each putative de novo motif, the percentage of target (aging DEGs) vs background genes is depicted. Genes of interest in this study are highlighted in red.
- (B) Distribution of *Vcam1* expression in (Left) venous and (Right) arterial cells in aged and young BECs.
- (C) Comparison of the signed p-value ( $\log_2FC^* - \log_{10}(FDR)$ ) of each DEG calculated from using only unbiasedly sorted or VCAM1-enriched (Left) venous or (Right) arterial cells. DEGs in the top 50<sup>th</sup> percentile (ranked by FDR) derived using the VCAM1-enriched datasets are labeled in red.
- (D) Accuracy analysis with ERCCs showing the relationship between the number of input ERCC molecules and the number detected by scRNAseq, for both aged and young cells.
- (E) Sensitivity analysis with ERCCs showing the number of ERCC molecules to reach 50% probability of detection, in either aged or young cells.
- (F) Forward vs backscatter (from flow cytometry) of aged and young endothelial cells. Violin plot comparison the FSC (representative of size) between aged and young cells.
- (G) Violin plots of the concentration of cDNA for each cell after 22 cycles of PCR amplification, the number of unique genes detected, and the sequencing depth, for aged compared to young cells.



**Figure S6. Analysis of DEGs associated with AMP treatment and overlaps with normal aging. Related to Figure 4.**

- (A) Ratio of A-C-V cells collected via unbiased CD31<sup>+</sup>CD45<sup>-</sup>CD11b<sup>-</sup> sorting remains largely unchanged in AMP- versus PBS-treated mice.
- (B) Scatterplot showing the genes which are oppositely differentially expressed (FDR<0.1 in both) between aging and AMP-treated venous cells. Note the relatively low number of common DEGs (red).
- (C) Scatterplot showing the genes which are oppositely differentially expressed (FDR<0.1 in both) between aging and AMP-treated arterial cells. Note the relatively low number of common DEGs (red).
- (D) GO analysis of the pathways enriched in the genes upregulated and downregulated with AMP treatment (compared to PBS)
- (E) Scatterplot of the signed p-values ( $-\log_{10}(\text{FDR}) \cdot \log_2\text{FC}$ ) for each gene. Genes differentially up- and down-regulated are marked in red. Top scoring genes are labeled.
- (F) Scatterplot of the mean  $\log_2\text{CPM}$  values of all genes in either AMP-treated or aged BECs. Common DEGs between the two conditions (B) are depicted in red. Top expressed genes are labeled. Note that all common DEGs are more highly expressed in AMP treatment than normal, disease-free aging.
- (G) Violin plot of the permuted distribution (when cell treatment labels are shuffled) of average log fold changes for several genes of interest in capillary cells, and the relative positions of the true observations and the 95<sup>th</sup> percentile of the permuted distributions.



**Figure S7. Analysis of DEGs associated with YMP treatment and overlaps with normal aging. Related to Figure 5.**

- (A) GO analysis of the pathways enriched in the genes up- and down-regulated with YMP treatment (compared to PBS).
- (B) Scatterplot of the signed p-values ( $-\log_{10}(\text{FDR}) \cdot \log_2\text{FC}$ ) for each gene. Genes differentially up- and down-regulated are marked in red. Top scoring genes are labeled.
- (C) Scatterplot of the mean  $\log_2\text{CPM}$  values of all genes in either YMP-treated or aged BECs. Common DEGs between the two conditions (B) are depicted in red. Top expressed genes are labeled in blue.
- (D) Violin plot of the permuted distribution (when cell treatment labels are shuffled) of average log fold changes for several genes of interest in capillary cells, and the relative positions of the observations and the 95<sup>th</sup> percentile of the permuted distributions.

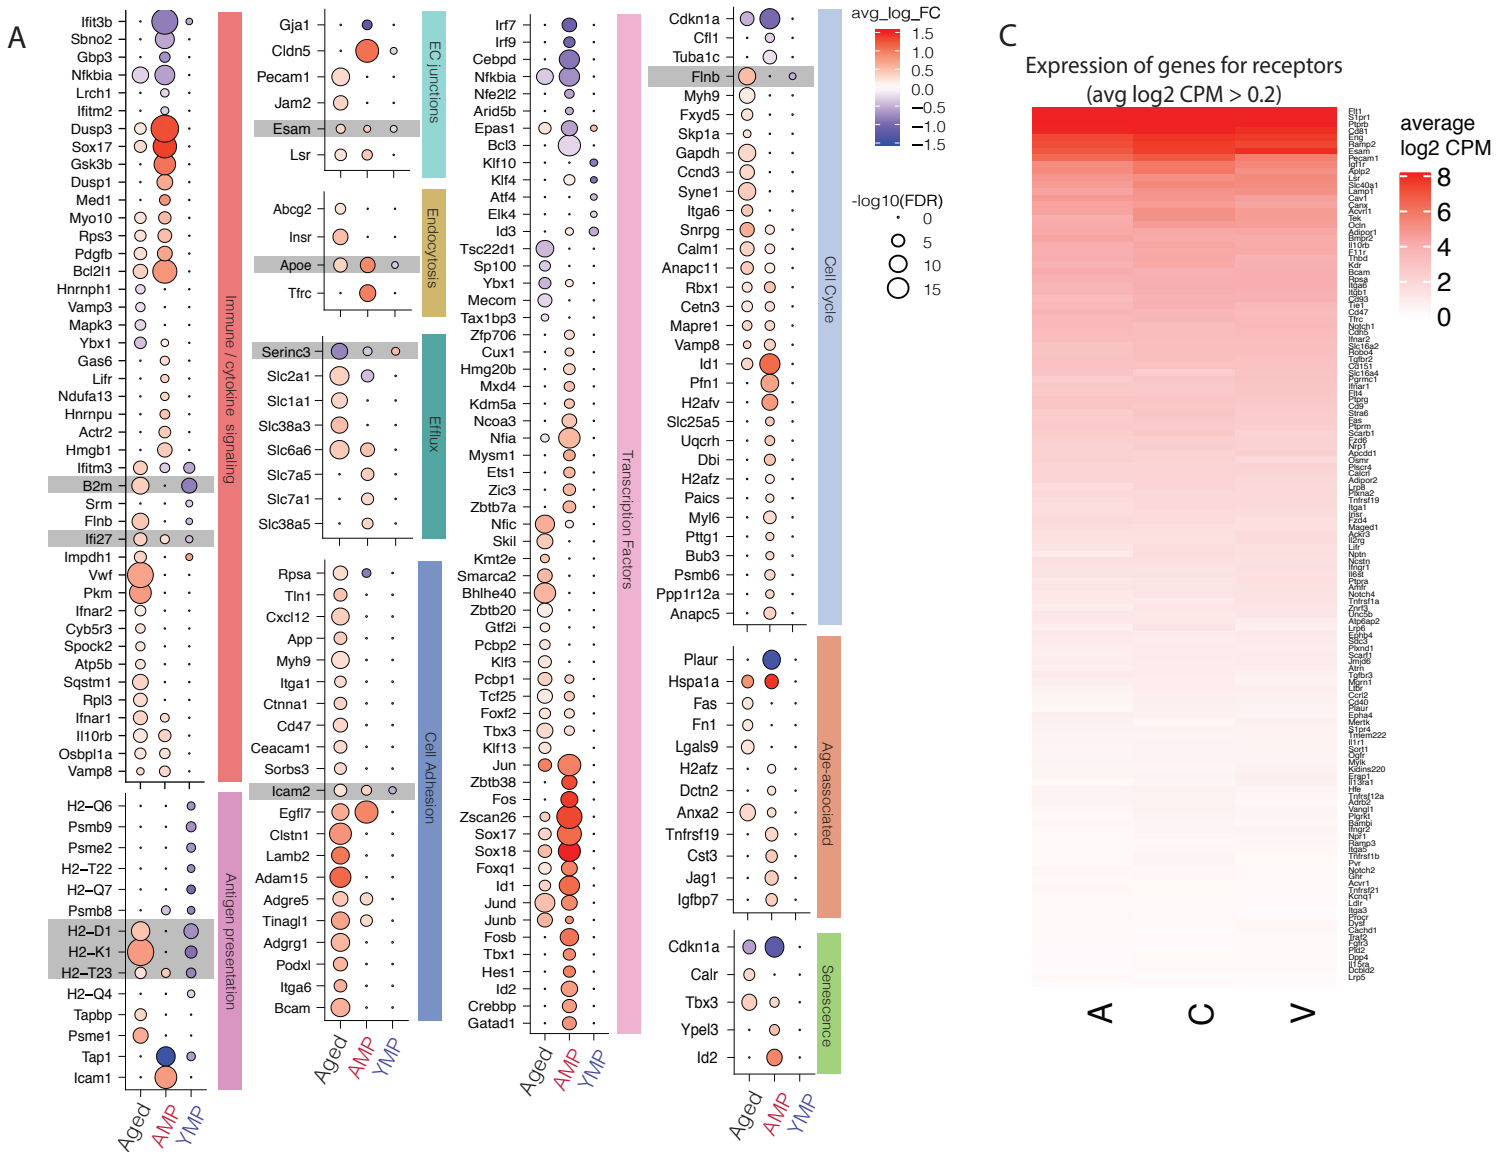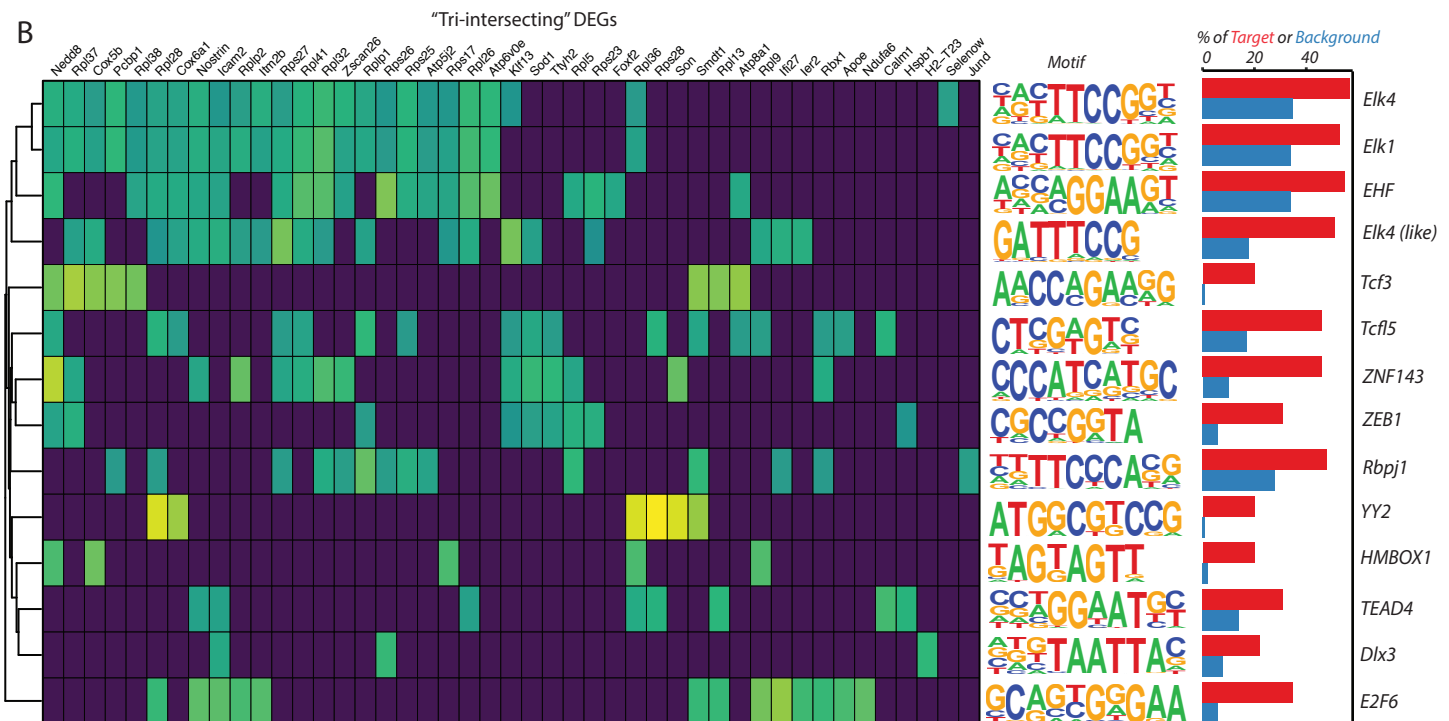



**Figure S8. Analysis of DEGs intersecting with normal aging, AMP treatment and YMP treatment. Related to Figure 6.**

- (A) Bubble plots of key genes grouped by function, and their log fold change values in each condition (Aged/Young, YMP/PBS, AMP/PBS). Gene of interest are highlighted in grey.
- (B) Regulatory motif enrichment analysis of the 42 “tri-intersecting” DEGs (upregulated with aged, AMP and downregulated with YMP) in capillaries was performed using HOMER. For each putative de novo motif, the percentage of target (DEGs) versus background genes is shown. Genes of interest in this study are highlighted in red.
- (C) Heatmap of the expression level of expressed genes encoding surface receptors in arterial, venous or capillary cells.

**Table S1. Distribution of numbers of mice, cells and independent sequencing runs. Related to Figure 1.**

| Condition     | # mice    | # cells Past (QC) | # sequencing runs spread over | # mice per run |      |      |      |      |      |      |      | Exps |  |   |
|---------------|-----------|-------------------|-------------------------------|----------------|------|------|------|------|------|------|------|------|--|---|
|               |           |                   |                               | Run1           | Run2 | Run3 | Run4 | Run5 | Run6 | Run7 | Run8 |      |  |   |
| Healthy Young | 6         | 981               | 4                             |                | 3    | 1    | 1    | 1    |      |      |      |      |  | 4 |
| Healthy Aged  | 6         | 1053              | 4                             |                | 3    | 1    | 1    | 1    |      |      |      |      |  | 4 |
| LPS           | 2         | 156               | 2                             |                |      | 1    | 1    |      |      |      |      |      |  | 2 |
| PBS           | 2         | 276               | 2                             |                |      | 1    | 1    |      |      |      |      |      |  | 2 |
| Young + AMP   | 4         | 333               | 3                             |                |      |      |      | 1    | 1    | 2    |      |      |  | 3 |
| Young + PBS   | 4         | 205               | 3                             |                |      |      |      | 1    | 1    | 2    |      |      |  | 3 |
| Aged +YMP     | 4         | 256               | 2                             |                |      |      |      |      |      |      | 2    | 2    |  | 2 |
| Aged + PBS    | 4         | 121               | 2                             |                |      |      |      |      |      |      | 2    | 2    |  | 2 |
| <b>Total</b>  | <b>32</b> | <b>3381</b>       |                               |                |      |      |      |      |      |      |      |      |  |   |
|               |           |                   |                               | Aging          | Exp1 | Exp2 | Exp3 | Exp4 |      |      |      |      |  |   |
|               |           |                   |                               | LPS            |      | Exp1 | Exp2 |      |      |      |      |      |  |   |
|               |           |                   |                               | AMP            |      |      |      | Exp1 | Exp2 | Exp3 |      |      |  |   |
|               |           |                   |                               | YMP            |      |      |      |      |      |      | Exp1 | Exp2 |  |   |

## **SUPPLEMENTARY TABLES**

### **Table S1**

Table outlining the experimental layout (number of mice, number of sequencing runs spread out over) for each treatment condition.
